# Supplementary material for: Sensory neuronal sensitisation occurs through HMGB-1–RAGE and TRPV1 in high-glucose conditions
Source: PubMed Central journal article supplement (PMC6080605; doi:10.1242/jcs.215939), 2018-07-26

**Table S1. Representative data and effect sizes for outcome measures shown in the text.**

Effect sizes calculated using G\*Power (Faul et al., 2007).

| Parameter                             | Naïve/control<br>Mean±SD (n) | Diabetic<br>Mean±SD(n)                   | Diabetic+VEGF-A <sub>165b</sub><br>Mean±SD (n)   | Effect size (n)<br>(Cohen's d) | Figure |
|---------------------------------------|------------------------------|------------------------------------------|--------------------------------------------------|--------------------------------|--------|
| Diabetic rat experiments              |                              |                                          |                                                  |                                |        |
| Behaviour - thermal                   | 12.9 ± 2.9 (11)              | 7.9 ± 1.2 (9)                            | 11.7 ± 2.1 (9)                                   | 1.05 (28)                      | 1      |
| Behaviour – von Frey                  | 13.4 ± 7.2 (11)              | 4.5 ± 3.2 (9)                            | 9.5 ± 4.3 (9)                                    | 0.74 (29)                      | 1      |
| HMGB1 western blots                   | 0.96±0.7 (5)                 | 5.4 ± 3.6 (4)                            | 3.7 ± 2.1 (4)                                    | 0.94 (13)                      | 2B     |
| RAGE expression-%                     | 62 ± 4.8 (4)                 | 76 ± 4.1 (3)                             | 76 ± 5.9 (3)                                     | 1.37 (11)                      | 3B     |
| RAGE expression-intensity             | 17.8 ± 2.7 (4)               | 55.6 ± 9.7 (3)                           | 35.2 ± 6.7 (3)                                   | 2.6 (11)                       | 3C     |
| In vitro DRG/50B11 experiments        | Control                      | Intervention<br>(high glucose/<br>HMGB1) | Intervention +<br>VEGF-A <sub>165b</sub> /FPSZM1 | Effect size (n)                | Figure |
| TRPV1 activity<br>(DRG neurons)       | 41.4 ± 7.3 (3)               | 78.3 ± 19.5 (3)                          | 24.6 ± 17 (3)                                    | 1.32 (9)                       | 5B     |
| TRPV1                                 | 0.86 ± 0.09 (9)              | 0.85 ± 0.07 (9)                          | 1.002 ± 0.09 (3)                                 | 0.56 (21)                      | 5E     |
| pTRPV1 (50B11 neurons)                | 0.84 ± 0.14 (3)              | 1.23 ± 0.1 (3)                           | 0.38 ± 0.09 (3)                                  | 3.48 (9)                       | 5D     |
| TRPV1 activity (+HMGB1)               | 29 ± 9.6 (4)                 | 121 ± 43 (4)                             | 50 ± 5 (4)                                       | 3.93 (12)                      | 8B     |
| TRPV1 activity<br>(high glu ± FPSZM1) | 75.8 ± 25 (4)                | 189.9 ± 88 (5)                           | 40.9 ± 9.3 (4)                                   | 2.42 (13)                      | 6C     |
| TRPV1 activity<br>(HMGB ± FPSZM1)     | 29.1±4.8 (4)                 | 90.4±4.1 (4)                             | 22.8±7.7 (4)                                     | 2.65 (12)                      | 7B     |

Faul, F., Erdfelder, E., Lang, A. G. and Buchner, A. (2007). G\*Power 3: a flexible statistical power analysis program for the social, behavioral, and biomedical sciences. *Behav Res Methods* 39, 175-91.

**Table S2. Antibody information**

| Target                                         | Antibody type     | Source and catalogue number                 | Dilution | Ref                        |
|------------------------------------------------|-------------------|---------------------------------------------|----------|----------------------------|
| <b>Primary antibodies–Western blotting</b>     |                   |                                             |          |                            |
| TRPV1                                          | Rabbit polyclonal | Abcam (Ab10296)                             | 1:500    | (Hulse et al., 2014)       |
| p800-TRPV1                                     | Rabbit polyclonal | Abnova (PAB8499)                            | 1:250    | (Mandadi et al., 2006)     |
| HMGB1                                          | Rabbit polyclonal | Abcam (Ab18256)                             | 1:1000   | (Xiong et al., 2016)       |
| Actin                                          | Goat polyclonal   | Santa Cruz (sc-1615)                        | 1:200    | (Stanojlović et al., 2016) |
| <b>Primary antibodies–immunofluorescence</b>   |                   |                                             |          |                            |
| RAGE                                           | Rabbit polyclonal | AbCam (Ab37647)                             | 1:500    | (Shirley et al., 2014)     |
| NeuN                                           | Mouse monoclonal  | Millipore (MAB377)                          | 1:200    | (Krzisch et al., 2015)     |
| <b>Secondary antibodies–Western blotting</b>   |                   |                                             |          |                            |
| Anti-rabbit                                    | Donkey            | Licor IRDye 680RD (926-68071)               | 1:1000   | (Del Nagro et al., 2014)   |
| Anti-goat                                      | Donkey            | Licor IRDye 800CW (925-32214)               | 1:1000   | (Genead et al., 2012)      |
| <b>Secondary antibodies–immunofluorescence</b> |                   |                                             |          |                            |
| Anti-rabbit                                    | Donkey            | Alexa Fluor 488-conjugated (AbCam Ab150073) | 1:500    | (Zhang et al., 2014)       |
| Anti-mouse                                     | Chicken           | Alexa Fluor 555-conjugated (AbCam150114)    | 1:500    | (Na Pombejra et al., 2017) |

### Figure S1

The antibody used for RAGE immunofluorescent staining of DRG neurons in Figure 2 was verified for specificity in immortalised rat DRG 50B11 neurons. This confirmed that the antibody detected a single band of size ~45kD. B= basal glucose (36mM), H = high glucose (66mM)

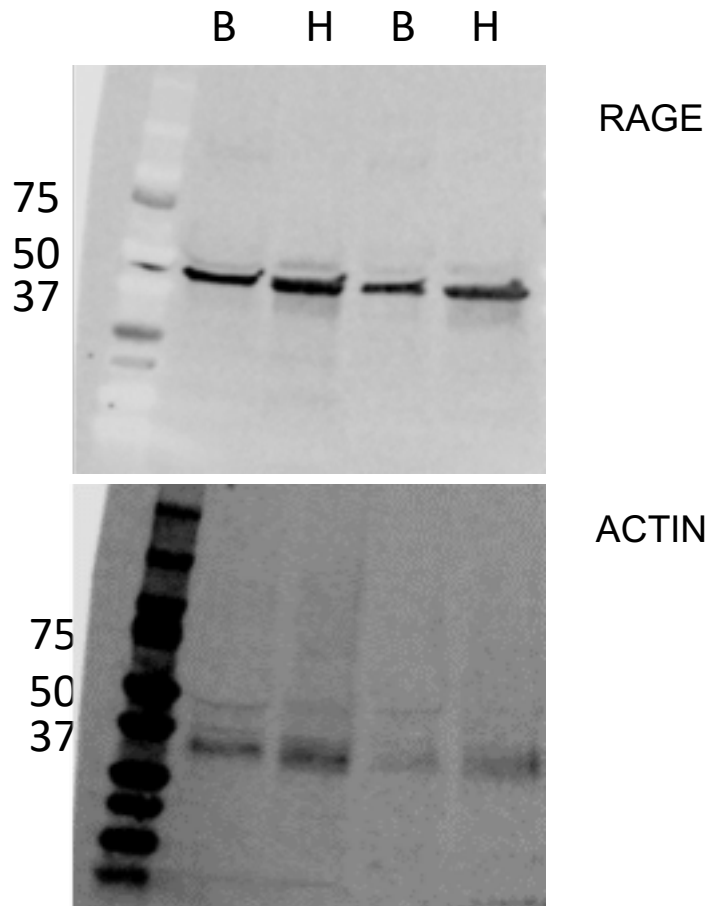

Supplement: joces-131-215939-s1.pdf [file joces-131-215939-s1.pdf]
